# Supplementary material for: Transcriptional Regulation of Small Heat Shock Protein 17 (sHSP-17) by Triticum aestivum HSFA2h Transcription Factor Confers Tolerance in Arabidopsis under Heat Stress
Source: MDPI journal article supplement (doi:10.3390/plants12203598), 2023-10-17
Supplement: s1 [file s1]

**Table S1.** Identification of novel heat-responsive transcription factors (TFs) and their chromosomal localization in wheat using *de novo* transcriptomic approach.

| Transcript IDs                  | Chromosomal Localization                                               | Notation                         |
|---------------------------------|------------------------------------------------------------------------|----------------------------------|
| HD2985_Stress_transcript_9649   | dna:scaffold scaffold:IWGSP1:IWGSC_CSS_4DL_scaff_4DL_14373906:1:4475:1 | HSHD2985_Stress_TF a-1b          |
| HD2985_Control_transcript_12551 | dna:scaffold scaffold:IWGSP1:IWGSC_CSS_2AL_scaff_6370272:1:4961:1      | heat shock protein binding       |
| HD2985_Stress_transcript_10840  | dna:scaffold scaffold:IWGSP1:IWGSC_CSS_3DS_scaff_2560988:1:5582:1      | heat-shock protein binding       |
| HD2985_Stress_transcript_12230  | dna:scaffold scaffold:IWGSP1:IWGSC_CSS_2AL_scaff_6439261:1:7602:1      | heat shock factor protein 4      |
| HD2985_Stress_transcript_12337  | dna:scaffold scaffold:IWGSP1:IWGSC_CSS_1AL_scaff_3975644:1:3913:1      | heat shock protein 101 binding   |
| HD2985_Stress_transcript_13053  | dna:scaffold scaffold:IWGSP1:IWGSC_CSS_7BS_scaff_3143055:1:7681:1      | heat-shock protein binding       |
| HD2985_Stress_transcript_16267  | dna:scaffold scaffold:IWGSP1:IWGSC_CSS_7AS_scaff_4217917:1:8113:1      | heat-shock protein binding       |
| HD2985_Stress_transcript_16474  | dna:scaffold scaffold:IWGSP1:IWGSC_CSS_4AS_scaff_5934783:1:12253:1     | hsf-type dna-binding domain      |
| HD2985_Stress_transcript_16876  | dna:scaffold scaffold:IWGSP1:IWGSC_CSS_5DL_scaff_4598213:1:13044:1     | heat shock factor protein 4      |
| HD2985_Stress_transcript_17958  | dna:scaffold scaffold:IWGSP1:IWGSC_CSS_7AS_scaff_4217917:1:8113:1      | heat-shock protein binding       |
| HD2985_Stress_transcript_19401  | dna:scaffold scaffold:IWGSP1:IWGSC_CSS_7AS_scaff_4217917:1:8113:1      | heat-shock protein binding       |
| HD2985_Stress_transcript_23590  | dna:scaffold scaffold:IWGSP1:IWGSC_CSS_7AS_scaff_4217917:1:8113:1      | heat-shock protein binding       |
| HD2985_Stress_transcript_411    | dna:scaffold scaffold:IWGSP1:IWGSC_CSS_1DL_scaff_2241610:1:3486:1      | heat shock protein 101 binding   |
| HD2985_Stress_transcript_461    | dna:scaffold scaffold:IWGSP1:IWGSC_CSS_1BL_scaff_3852546:1:4535:1      | dnaj heat shock family protein   |
| HD2985_Stress_transcript_733    | dna:scaffold scaffold:IWGSP1:IWGSC_CSS_1BL_scaff_3852546:1:4535:1      | dnaj heat shock family protein   |
| HD2985_Stress_transcript_7730   | dna:scaffold scaffold:IWGSP1:IWGSC_CSS_4DL_scaff_4DL_14373906:1:4475:1 | HS HD2985_Stress_TF factor a-1b  |
| HD2985_Stress_transcript_898    | dna:scaffold scaffold:IWGSP1:IWGSC_CSS_7BS_scaff_3143057:1:9636:1      | heat-shock protein binding       |
| HD2985_Stress_transcript_9315   | dna:scaffold scaffold:IWGSP1:IWGSC_CSS_4DL_scaff_4DL_14373906:1:4475:1 | HS HD2985_Stress_TF a-1b         |
| HD2985_Stress_transcript_9632   | dna:scaffold scaffold:IWGSP1:IWGSC_CSS_4AS_scaff_5936883:1:19007:1     | HS HD2985_Stress_TF a-1b         |
| HD2985_Stress_transcript_7291   | dna:scaffold scaffold:IWGSP1:IWGSC_CSS_1AL_scaff_3922902:1:6366:1      | dnaj heat shock factor protein   |
| HD2329_Stress_transcript_621    | dna:scaffold scaffold:IWGSP1:IWGSC_CSS_4AS_scaff_5927411:1:24094:1     | heat-shock protein 70t-2 binding |
| HD2329_Stress_transcript_1085   | dna:scaffold scaffold:IWGSP1:IWGSC_CSS_7BS_scaff_3143055:1:7681:1      | heat-shock protein binding       |
| HD2329_Stress_transcript_1177   | dna:scaffold scaffold:IWGSP1:IWGSC_CSS_7BS_scaff_3082537:1:7804:1      | heat-shock protein binding       |
| HD2329_Stress_transcript_5774   | dna:scaffold scaffold:IWGSP1:IWGSC_CSS_2AL_scaff_6370272:1:4961:1      | heat shock protein binding       |
| HD2329_Stress_transcript_7756   | dna:scaffold scaffold:IWGSP1:IWGSC_CSS_4BL_scaff_6990050:1:3750:1      | HS HD2329_Stress_TF a-1b         |
| HD2329_Stress_transcript_8502   | dna:scaffold scaffold:IWGSP1:IWGSC_CSS_2BL_scaff_8050210:1:14690:1     | HD2329_Stress_TF rf2b-like       |
| HD2329_Stress_transcript_10598  | dna:scaffold scaffold:IWGSP1:IWGSC_CSS_3DS_scaff_2560988:1:5582:1      | heat-shock protein binding       |
| HD2329_Stress_transcript_10836  | dna:scaffold scaffold:IWGSP1:IWGSC_CSS_3B_scaff_10495529:1:5234:1      | heat-shock protein binding       |
| HD2329_Stress_transcript_16627  | dna:scaffold scaffold:IWGSP1:IWGSC_CSS_2BL_scaff_8037467:1:10372:1     | heat shock factor protein 4      |
| HD2329_Stress_transcript_18200  | dna:scaffold scaffold:IWGSP1:IWGSC_CSS_5DL_scaff_4598213:1:13044:1     | heat shock factor                |
| HD2329_Stress_transcript_22436  | dna:scaffold scaffold:IWGSP1:IWGSC_CSS_2DL_scaff_9898261:1:4179:1      | heat shock factor protein 4      |
| HD2329_Stress_transcript_27031  | dna:scaffold scaffold:IWGSP1:IWGSC_CSS_7AS_scaff_4217917:1:8113:1      | heat-shock protein binding       |
| HD2329_Control_transcript_1428  | dna:scaffold scaffold:IWGSP1:IWGSC_CSS_2DS_scaff_5389432:1:16313:1     | heat shock protein 90 binding    |
| HD2329_Control_transcript_2715  | dna:scaffold scaffold:IWGSP1:IWGSC_CSS_1BL_scaff_3852546:1:4535:1      | heat shock protein binding       |
| HD2329_Control_transcript_6183  | dna:scaffold scaffold:IWGSP1:IWGSC_CSS_7BS_scaff_3143055:1:7681:1      | heat-shock protein binding       |
| HD2329_Control_transcript_8846  | dna:scaffold scaffold:IWGSP1:IWGSC_CSS_1DL_scaff_2241610:1:3486:1      | heat shock protein 101 binding   |
| HD2329_Control_transcript_12353 | dna:scaffold scaffold:IWGSP1:IWGSC_CSS_4DL_scaff_4DL_14373906:1:4475:1 | HS HD2329_Control_TF a-1b        |
